# Supplementary material for: ZnS microsphere/g-C3N4nanocomposite photo-catalyst with greatly enhanced visible light performance for hydrogen evolution: synthesis and synergistic mechanism study
Source: Royal Society of Chemistry journal article supplement (doi:10.1039/c4ra11740a), 2014-11-12
Supplement: c4ra11740a1.pdf [file c4ra11740a1.pdf]

## Supporting Information

### ZnS microsphere/g-C<sub>3</sub>N<sub>4</sub> composite photocatalyst with greatly enhanced visible light performance for hydrogen evolution: Synthesis and synergistic mechanism study

Fenfen Shi,<sup>a</sup> Linlin Chen,<sup>a</sup> Chaosheng Xing,<sup>a</sup> Deli Jiang,<sup>\*,a</sup> Di Li,<sup>b</sup> and Min Chen<sup>\*,a</sup>

<sup>a</sup> School of Chemistry and Chemical Engineering, Jiangsu University, Zhenjiang 212013, China

<sup>b</sup> Institute of Energy, Jiangsu University, Zhenjiang 212013, China

E-mail address: dlj@ujs.edu.cn, chenmin3226@sina.com.

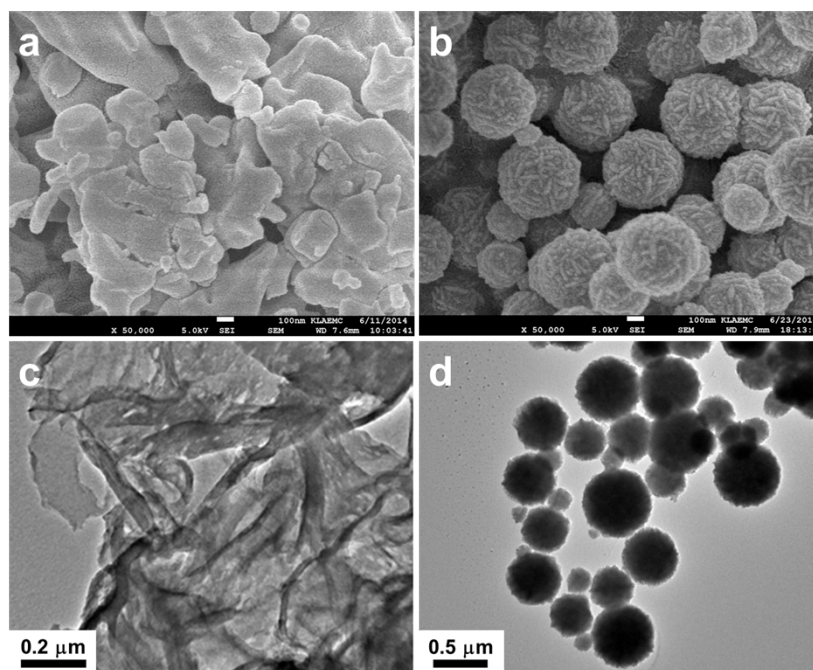

Fig. S1. SEM and TEM images of the pure g-C<sub>3</sub>N<sub>4</sub> (a,b) and ZnS (c,d).

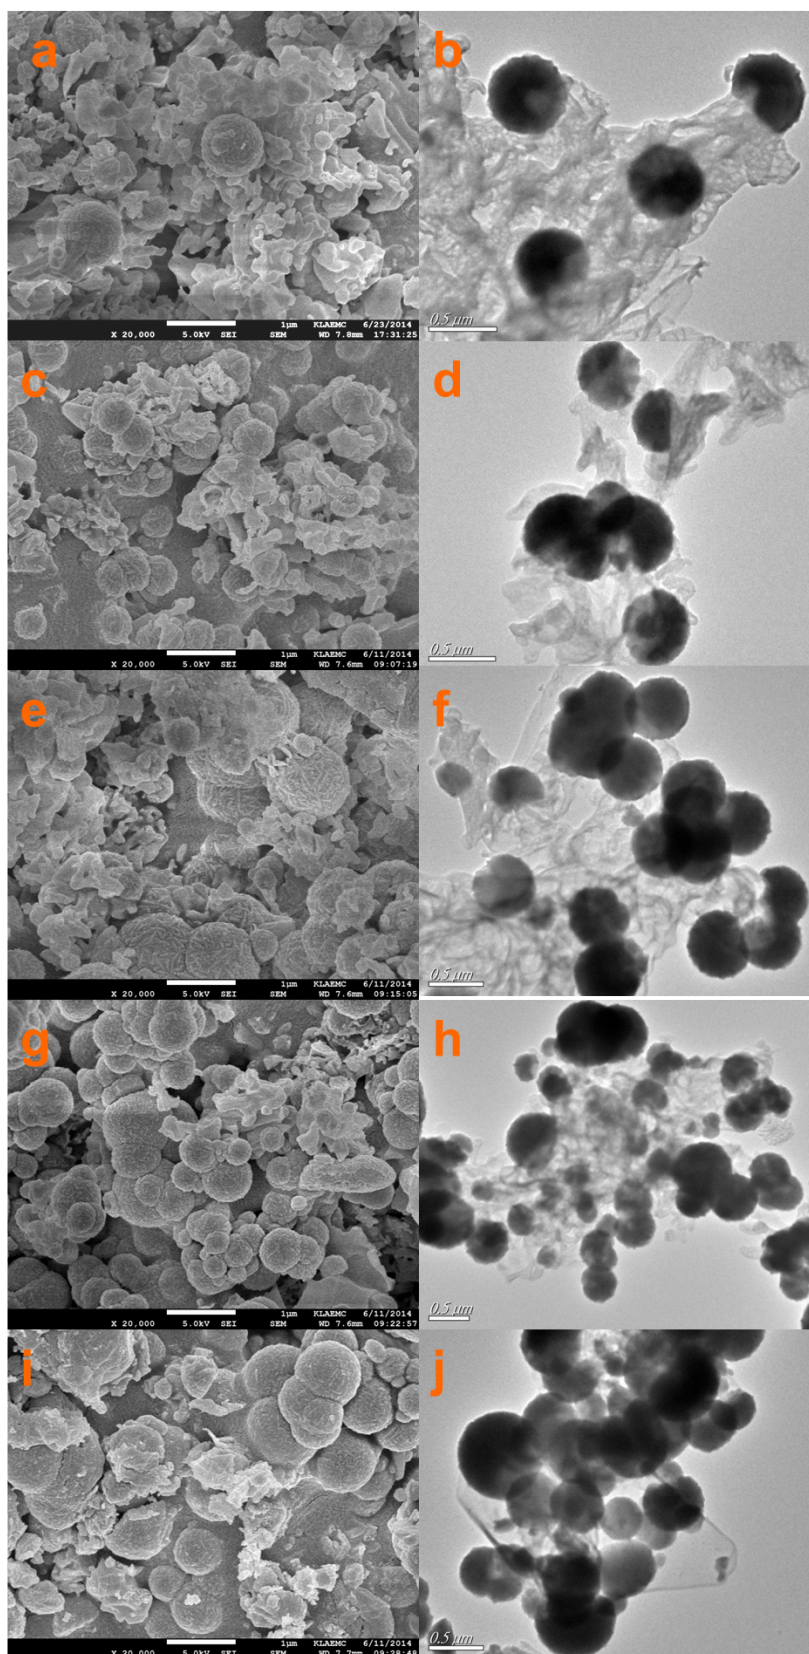

Fig. S2. SEM and TEM images of the resulted samples: (a,b) 20% ZnS/g-C<sub>3</sub>N<sub>4</sub>, (c,d) 30% ZnS/g-C<sub>3</sub>N<sub>4</sub>, (e,f) 40% ZnS/g-C<sub>3</sub>N<sub>4</sub>, (g,h) 60% ZnS/g-C<sub>3</sub>N<sub>4</sub>, (i,j) 70% ZnS/g-C<sub>3</sub>N<sub>4</sub>.

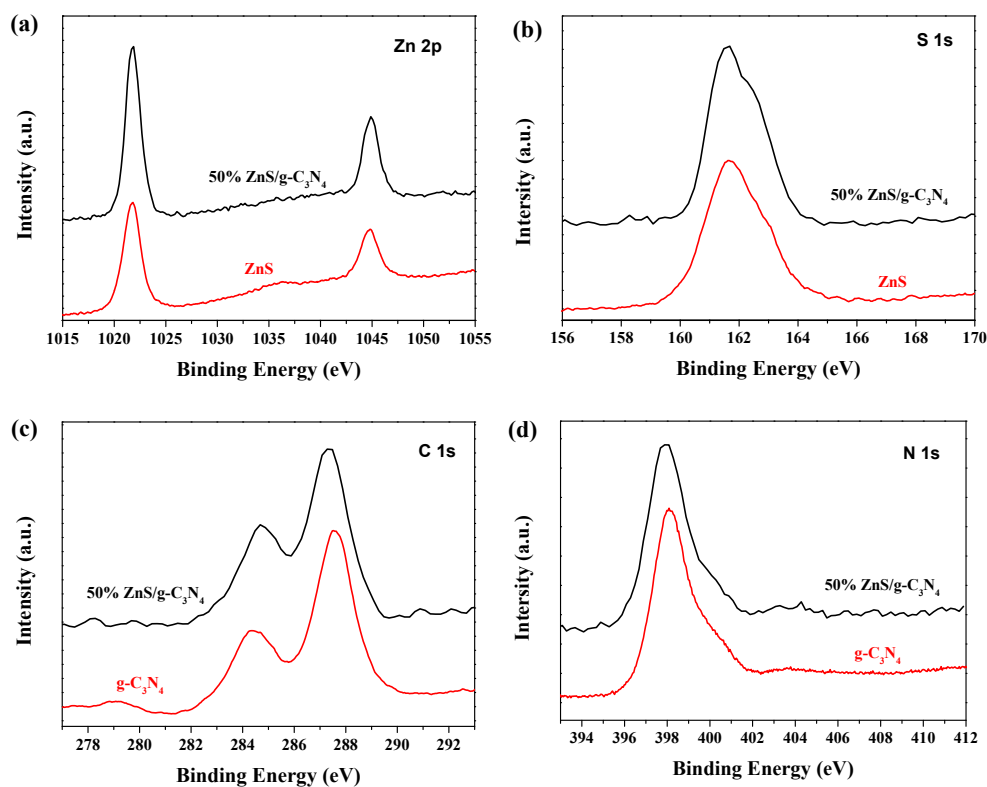

Fig. S3. XPS spectra of g-C<sub>3</sub>N<sub>4</sub>, ZnS, and 50 % ZnS/g-C<sub>3</sub>N<sub>4</sub> samples: (a) Zn 2p, (b) S 1s, (c) C 1s and (d) N 1s.

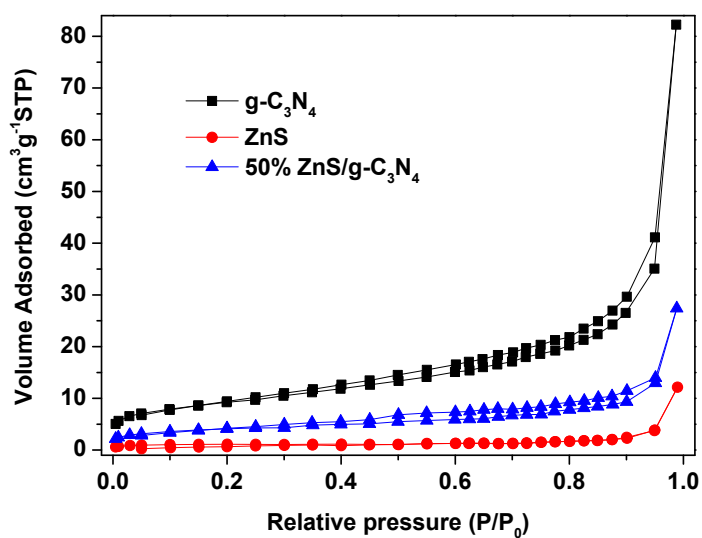

Fig. S4. N<sub>2</sub> adsorption/desorption isotherms of g-C<sub>3</sub>N<sub>4</sub> and 50% ZnS/g-C<sub>3</sub>N<sub>4</sub>.
